# Supplementary figures and images for: Development of the Nanobody display technology to target lentiviral vectors to antigen-presenting cells
Source: PubMed Central journal article supplement — Gene Ther. 2012 Jan 12;19(12):1133–40. doi: 10.1038/gt.2011.206 (PMC3520013; doi:10.1038/gt.2011.206), 2012-01-12

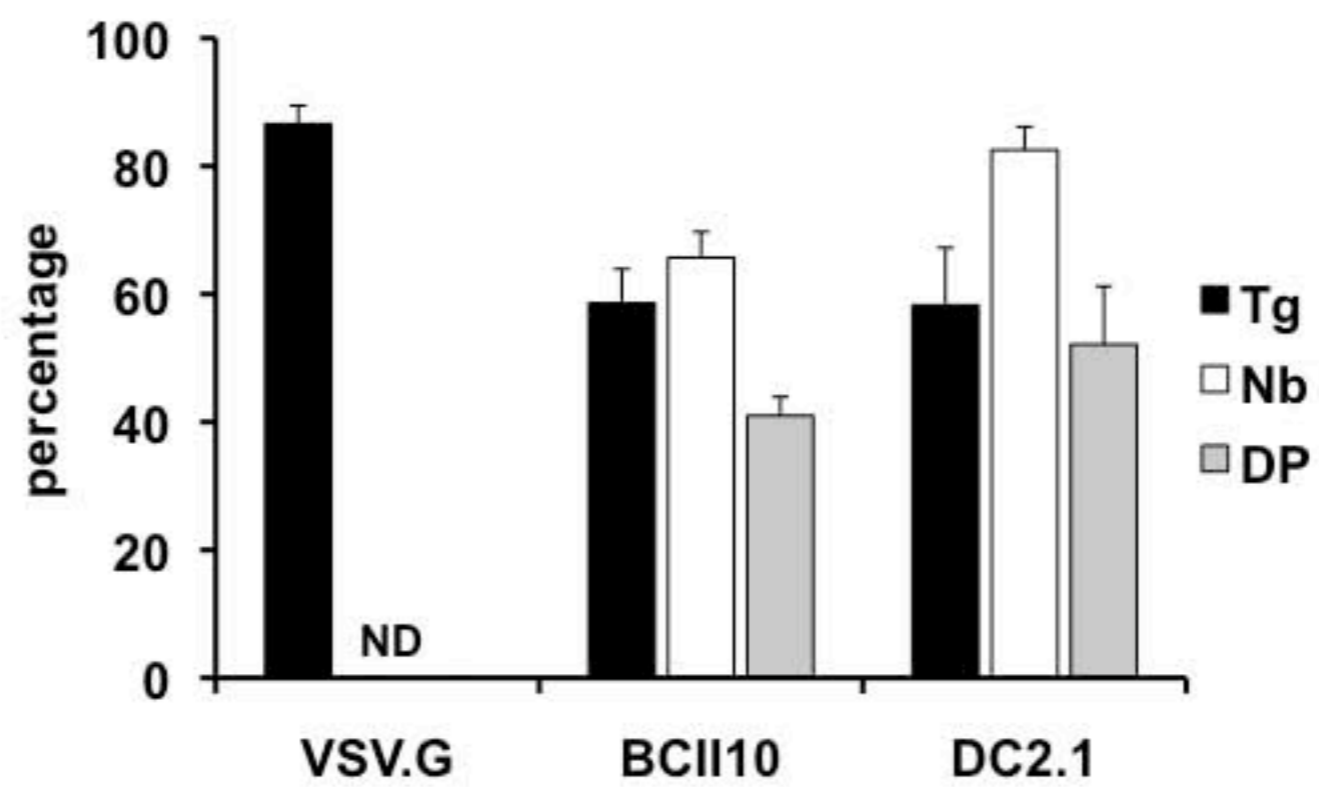

Supplement: gt2011206x2.pdf [file gt2011206x2.pdf]

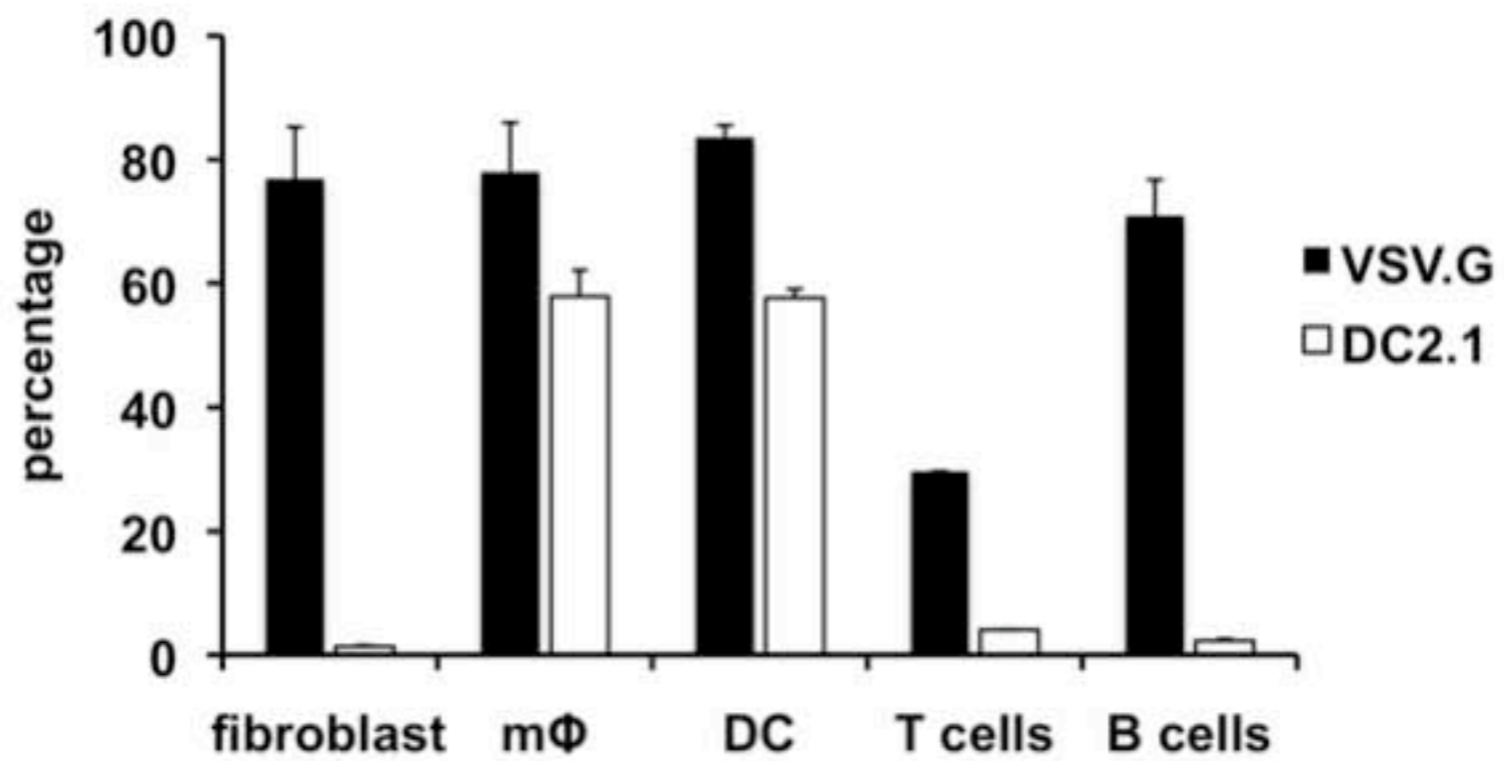

Supplement: gt2011206x3.pdf [file gt2011206x3.pdf]

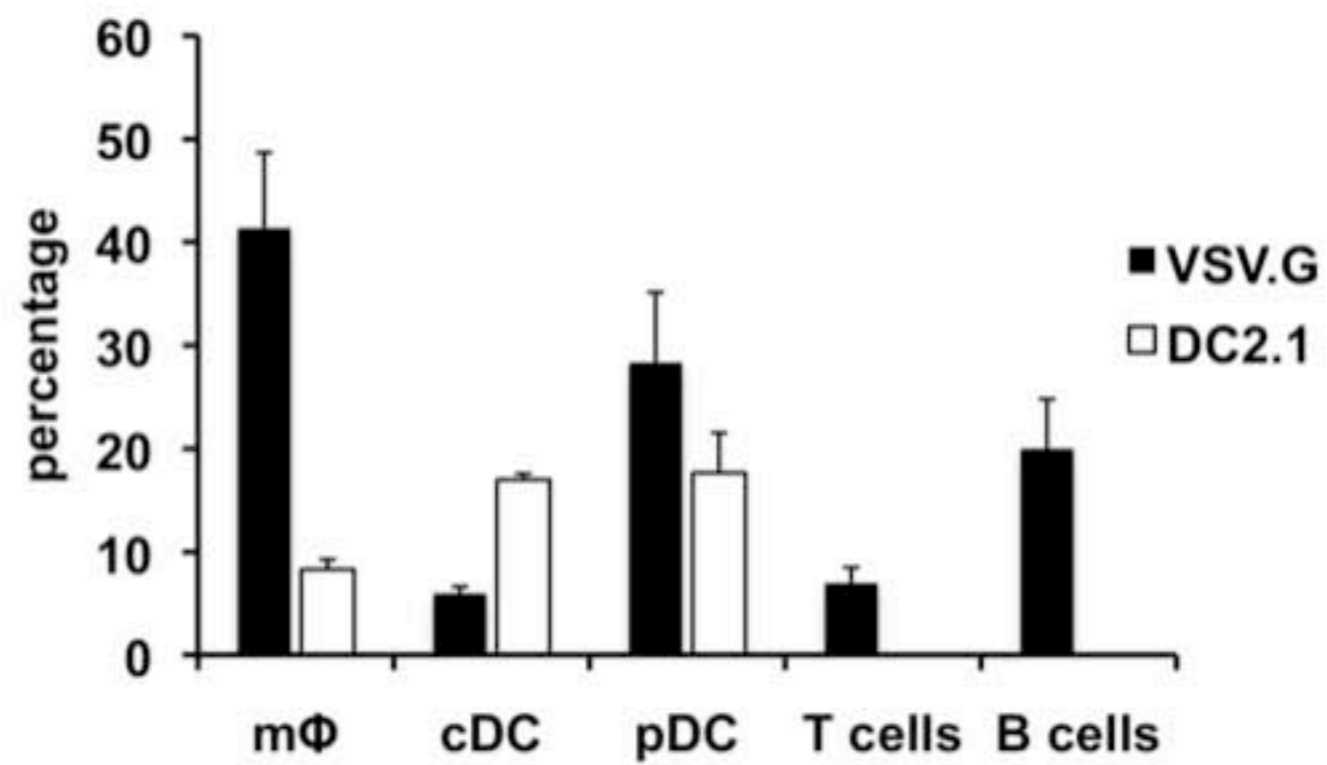

Supplement: gt2011206x4.pdf [file gt2011206x4.pdf]

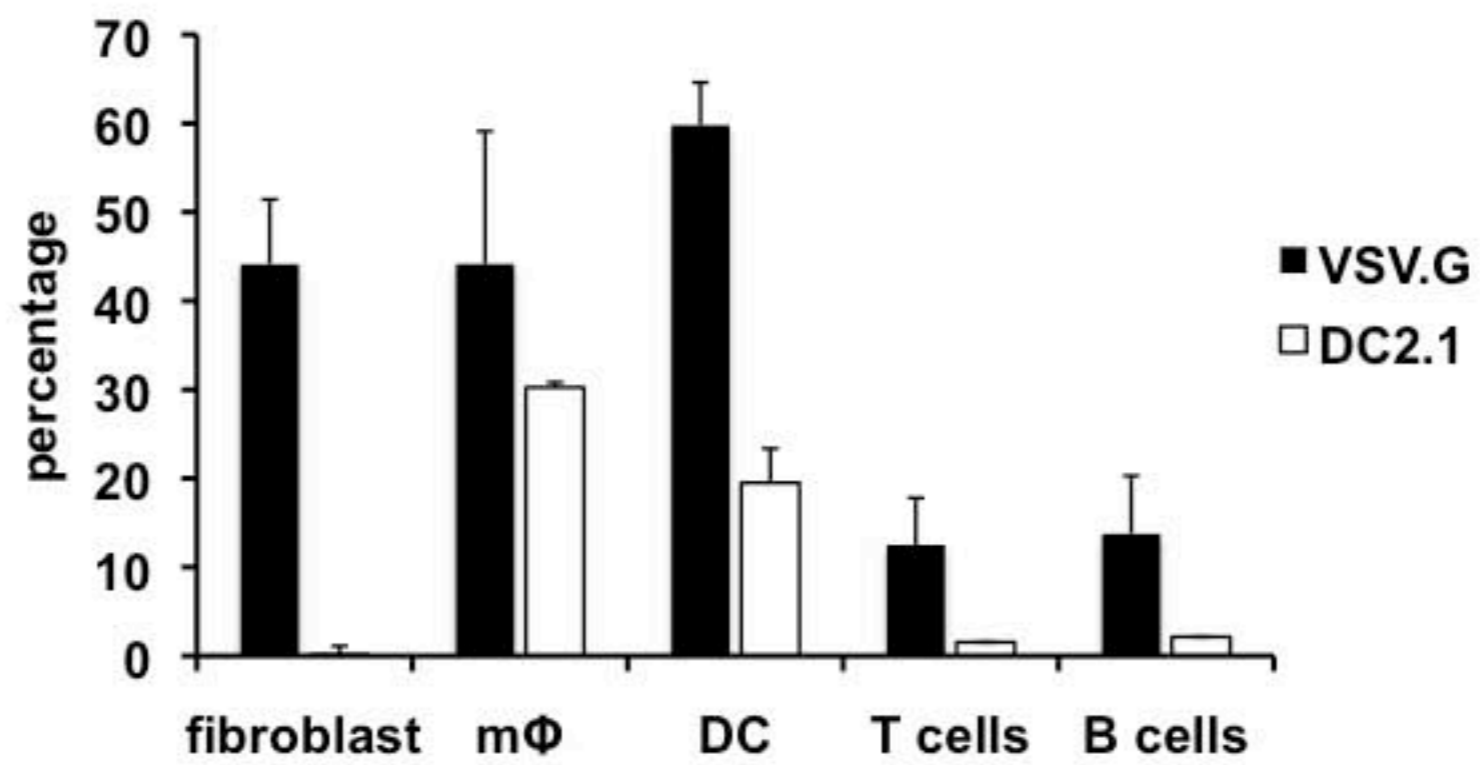

Supplement: gt2011206x5.pdf [file gt2011206x5.pdf]

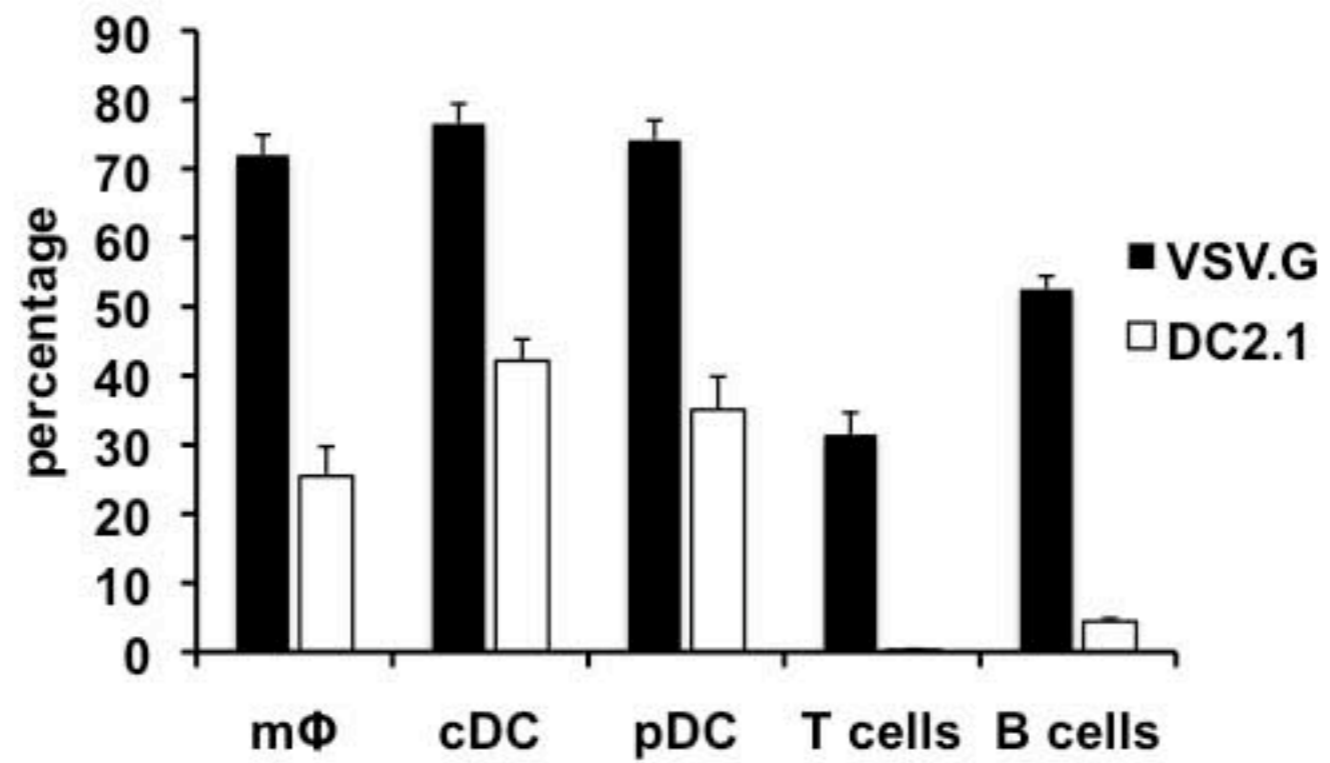

Supplement: gt2011206x6.pdf [file gt2011206x6.pdf]
